# Supplementary material for: Cascade catalytic nanoplatform constructed by laterally-functionalized pillar[5]arenes for antibacterial chemodynamic therapy
Source: Royal Society of Chemistry journal article supplement (doi:10.1039/d1tb00868d), 2021-01-01
Supplement: d1tb00868d1.pdf [file d1tb00868d1.pdf]

# Cascade Catalytic Nanoplatfom Constructed by Laterally-Functionalized Pillar[5]arenes for Antibacterial Chemodynamic Therapy

*Fei Li,<sup>a</sup> Mingsong Zang,<sup>a</sup> Jinxing Hou,<sup>a</sup> Quan Luo,<sup>a</sup> Shuangjiang Yu,<sup>b</sup> Hongcheng Sun,<sup>b</sup>*

*Jiayun Xu,<sup>a,b\*</sup> Junqiu Liu<sup>a,b\*</sup>*

a. State Key Laboratory of Supramolecular Structure and Materials, College of Chemistry, Jilin University, Changchun 130012, People's Republic of China.

b. College of Material, Chemistry and Chemical Engineering, Hangzhou Normal University, and Key Laboratory of Organosilicon Chemistry and Material Technology, Ministry of Education, Hangzhou, China.

\*E-mail: xujiayun@jlu.edu.cn; junqiuliu@jlu.edu.cn

## Contents

1. Experimental Section
2. Figure S1.  $^1\text{H}$ -NMR analysis of DMP5.
3. Figure S2. MALDI-TOF analysis of DMP5.
4. Figure S3. MALDI-TOF analysis of BDMP5.
5. Figure S4.  $^1\text{H}$ -NMR analysis of compound 1
6. Figure S5. MALDI-TOF analysis of compound 1
7. Figure S6. MALDI-TOF analysis of compound 2
8. Figure S7.  $^1\text{H}$ -NMR analysis of Man-DMA
9. Figure S8. MALDI-TOF analysis of Man-DMA
10. Figure S9. Partial chemical structures of polymer capsules
11. Figure S10. Hydrodynamic sizes
12. Figure S11. FTIR spectrum
13. Figure S12. TMB solution incubated nanocomplex

## Experimental Section

**Materials and Chemicals.** 1,4-dimethoxybenzene, paraformaldehyde, boron trifluoride diethyl etherate, N-bromosuccinimide, 1,8-diamino-3,6-dioxaoctane, sodium methoxide, 6-bromohexanol, trimethylamine, iodomethane and glucose were obtained from Energy Chemical. Glucose oxidase was obtained from Sigma-Aldrich. Ferroferric oxide nanoparticle was obtained from Shanghai Macklin Biochemical Co., Ltd. 1,2,3,4,6-Penta-O-acetyl- $\alpha$ -D-mannopyranose was obtained from TCI. Glutaraldehyde, Hydrogen Peroxide Assay Kit and propidium iodide were purchased from Beijing Solarbio Science & Technology Co., Ltd. (Beijing, China). Fetal bovine serum (FBS), RPMI 1640 culture medium, and penicillin-streptomycin solution were obtained from Sangon Biotech (Shanghai) Co., Ltd.

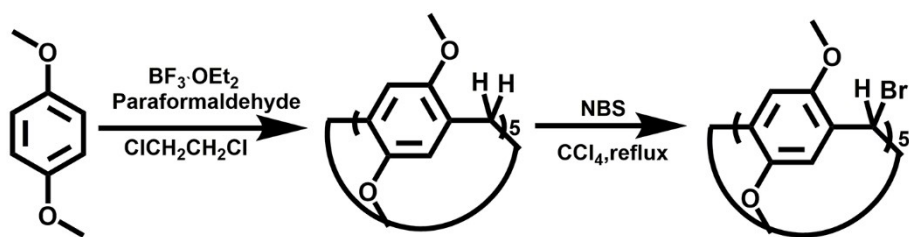

**Scheme S1.** Synthesis route of BDMP5.

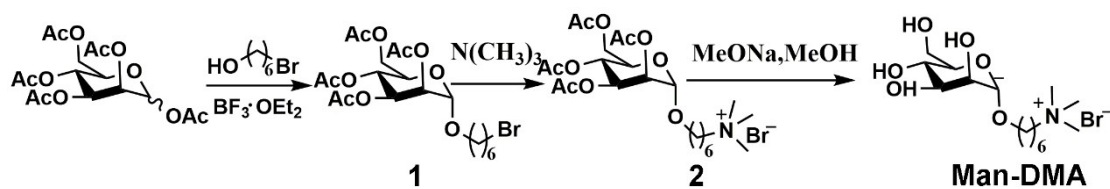

**Scheme S2.** Synthesis route of Man-DMA.

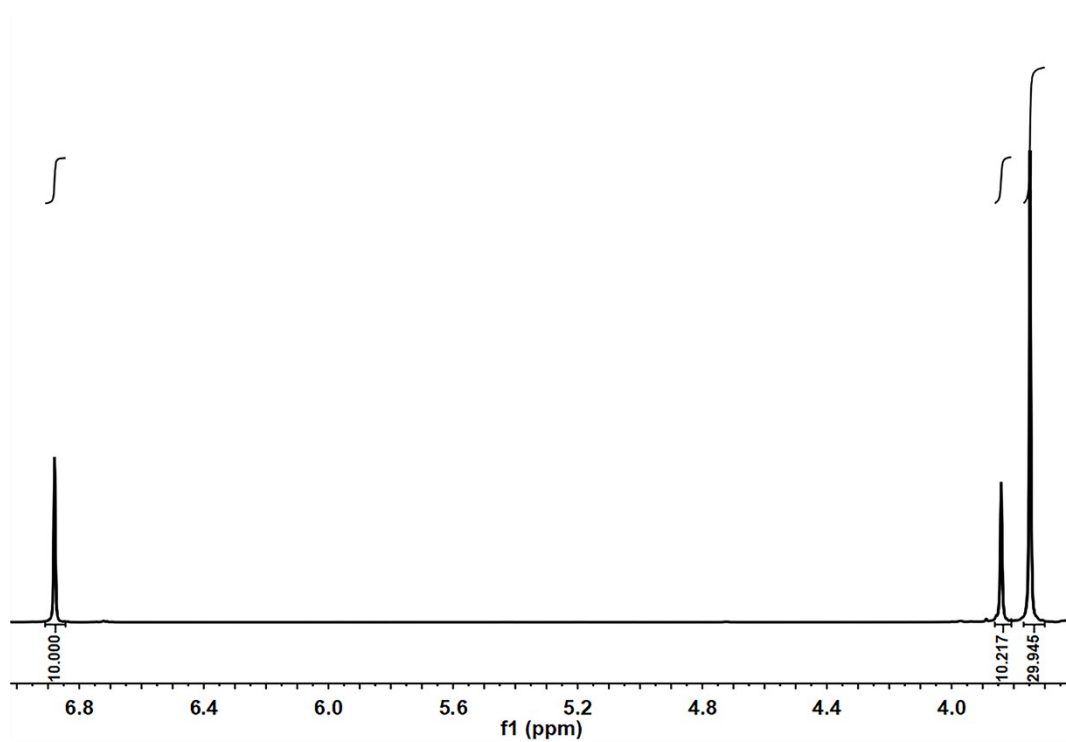

**Figure S1** <sup>1</sup>H-NMR analysis of DMP5. <sup>1</sup>H-NMR (500 MHz, CDCl<sub>3</sub>, 25 °C, TMS): δ (ppm):

6.88 (s, 10H), 3.84 (s, 10H), 3.75 (t, 30H).

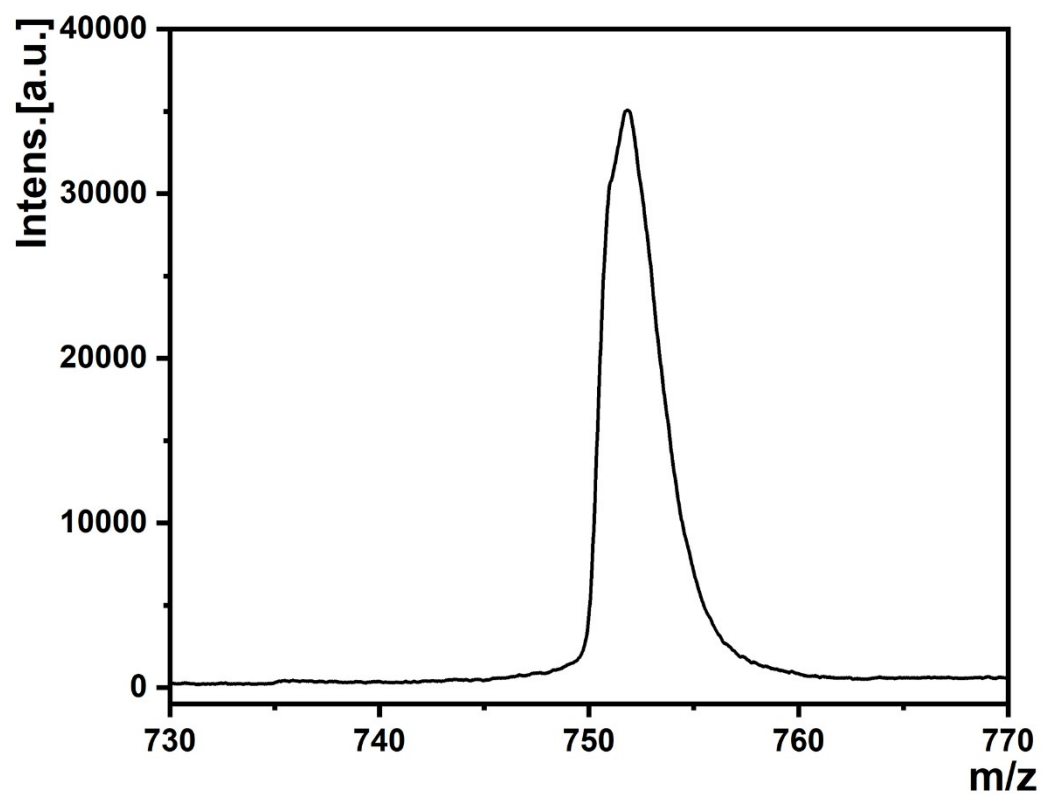

**Figure S2** MALDI-TOF analysis of DMP5. m/z: 750.54.

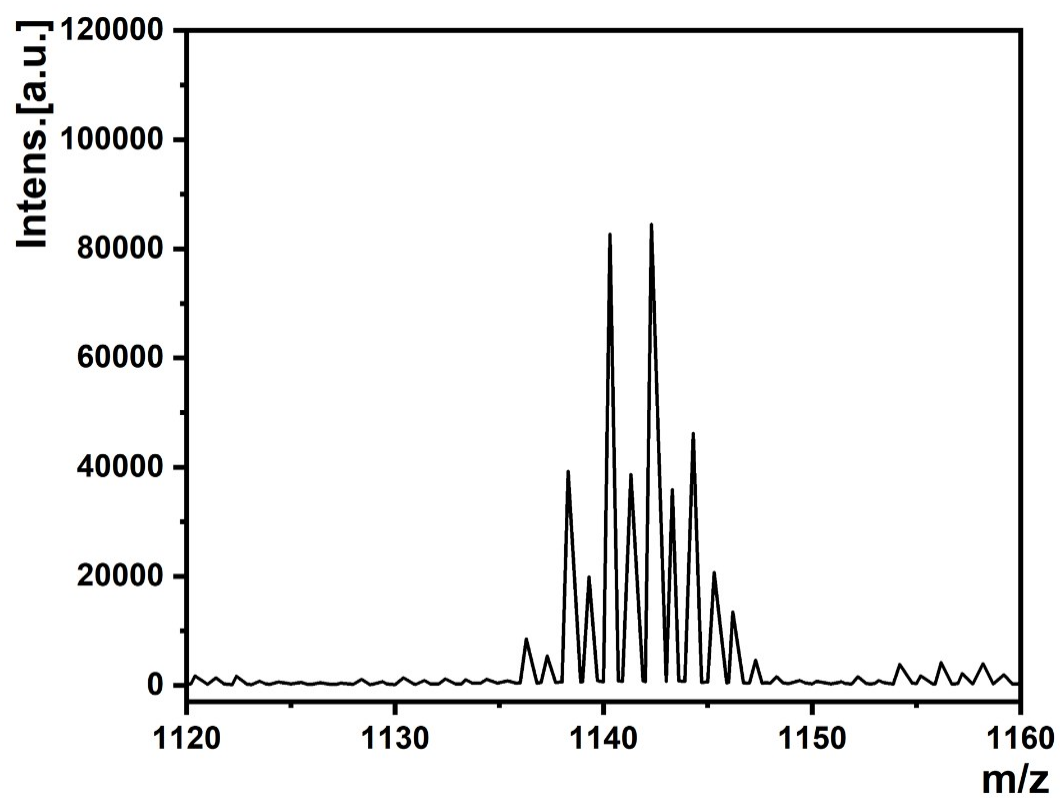

**Figure S3** MALDI-TOF analysis of BDMP5. m/z: 1139.4-1150.4.

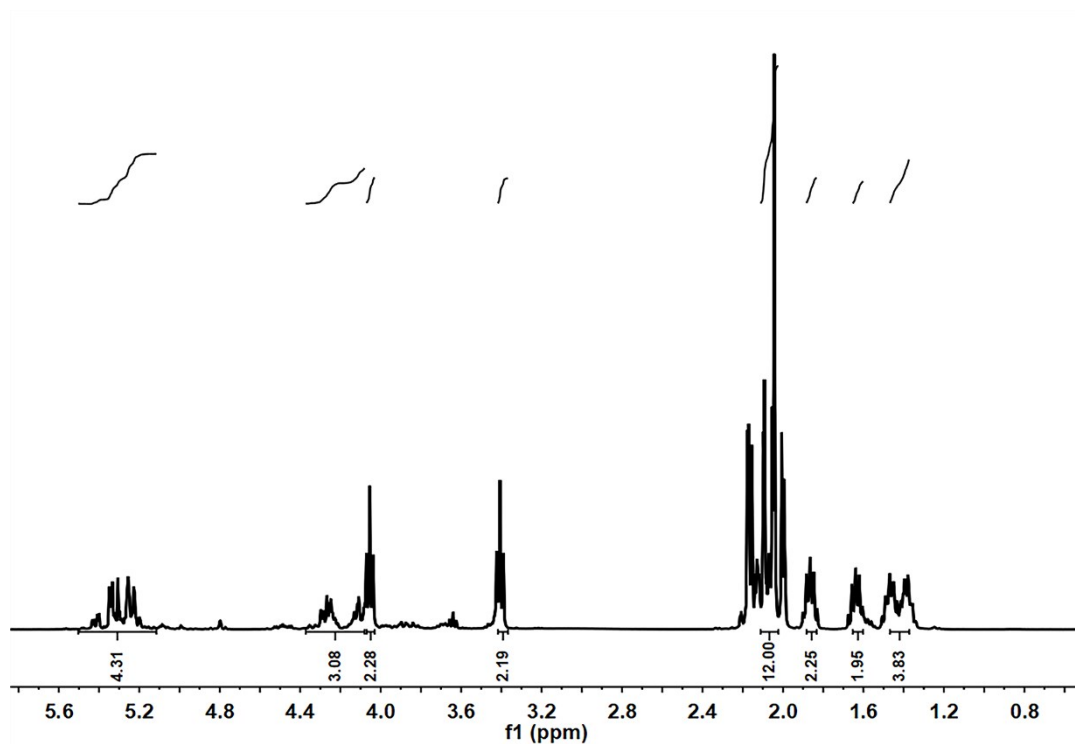

**Figure S4** <sup>1</sup>H-NMR analysis of compound 1. <sup>1</sup>H-NMR (500 MHz, CDCl<sub>3</sub>, 25 °C, TMS): δ (ppm): 5.43-5.21 (m, 4H), 4.31-4.11 (m, 3H), 4.05 (t, 2H), 3.40 (t, 2H), 2.05 (s, 12H), 1.90-1.81 (m, 2H), 1.68-1.59(m, 2H), 1.48-1.36 (m, 4H).



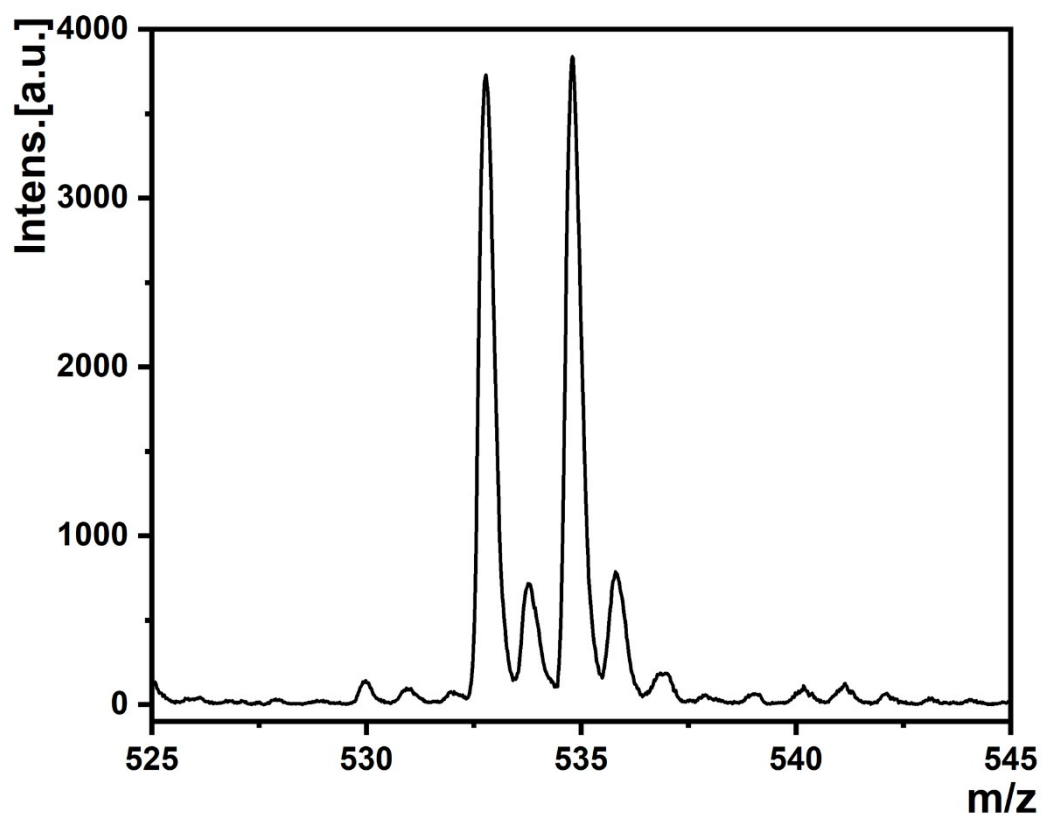

**Figure S5** MALDI-TOF spectrum of compound 1. m/z: 532.78 ( $[M+Na^+]$ ).

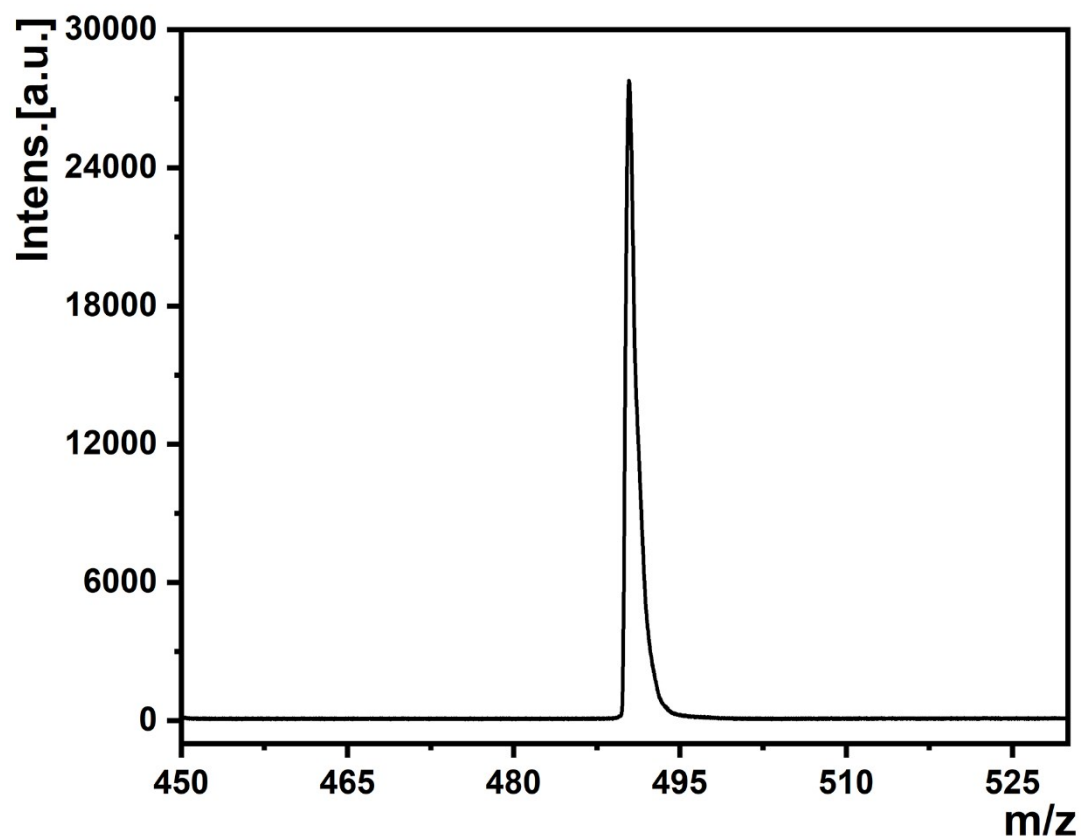

**Figure S6** MALDI-TOF spectrum of compound 2. m/z: 490.44.

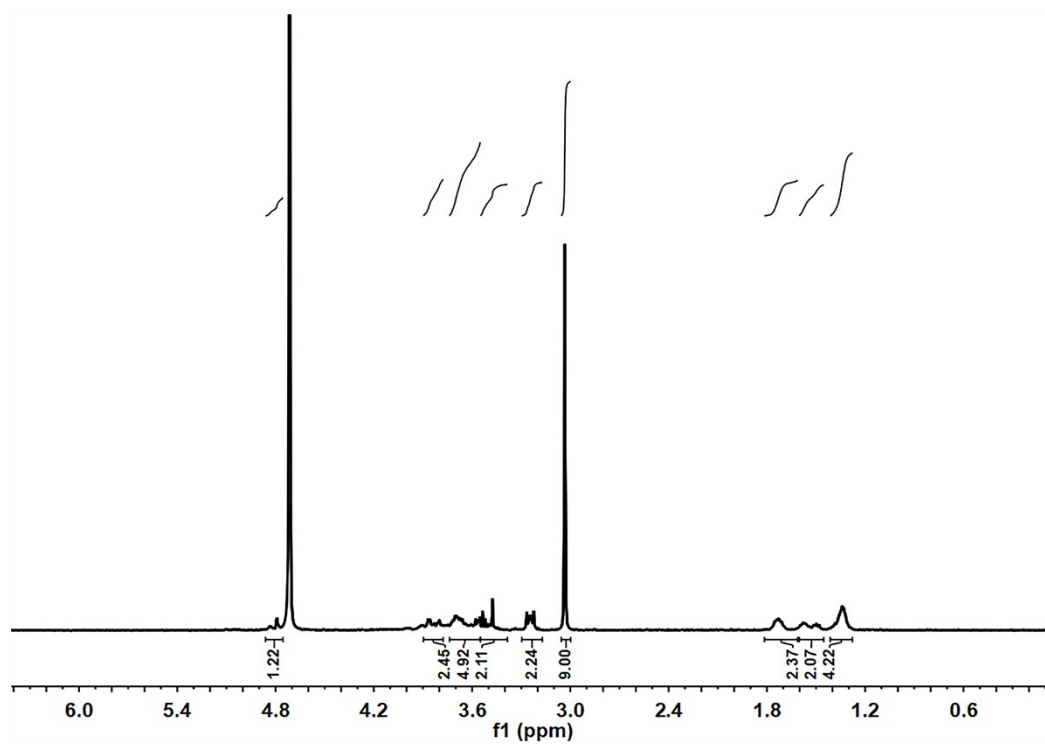

**Figure S7**  $^1\text{H}$ -NMR analysis of Man-DMA.  $^1\text{H}$ -NMR (500 MHz,  $\text{D}_2\text{O}$ , 25  $^\circ\text{C}$ , TMS):  $\delta$  (ppm): 4.83-4.76 (m, 1H), 3.89-3.77 (m, 2H), 3.74-3.54 (m, 5H), 3.54-3.38 (m, 2H), 3.30-3.17 (m, 2H), 3.03 (s, 9H), 1.81-1.61 (m, 2H), 1.60-1.45 (m, 2H), 1.41-1.27 (m, 4H).

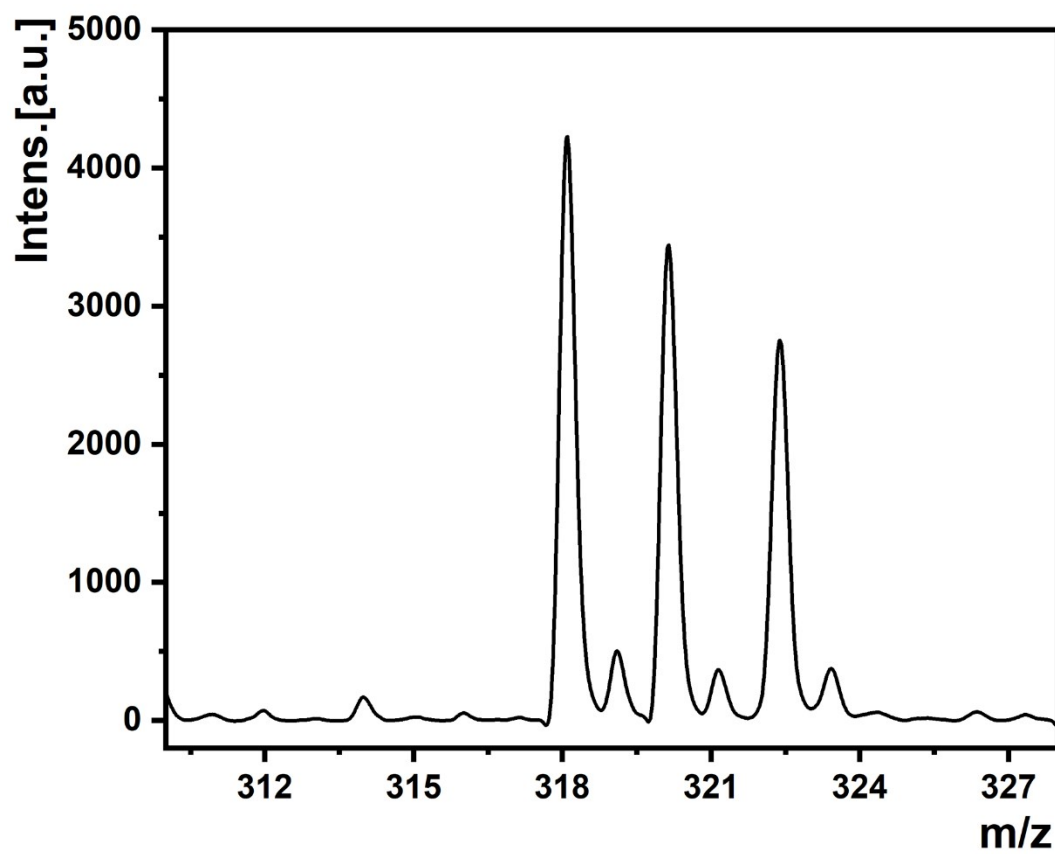

**Figure S8** MALDI-TOF spectrum of Man-DMA. m/z: 322.22.

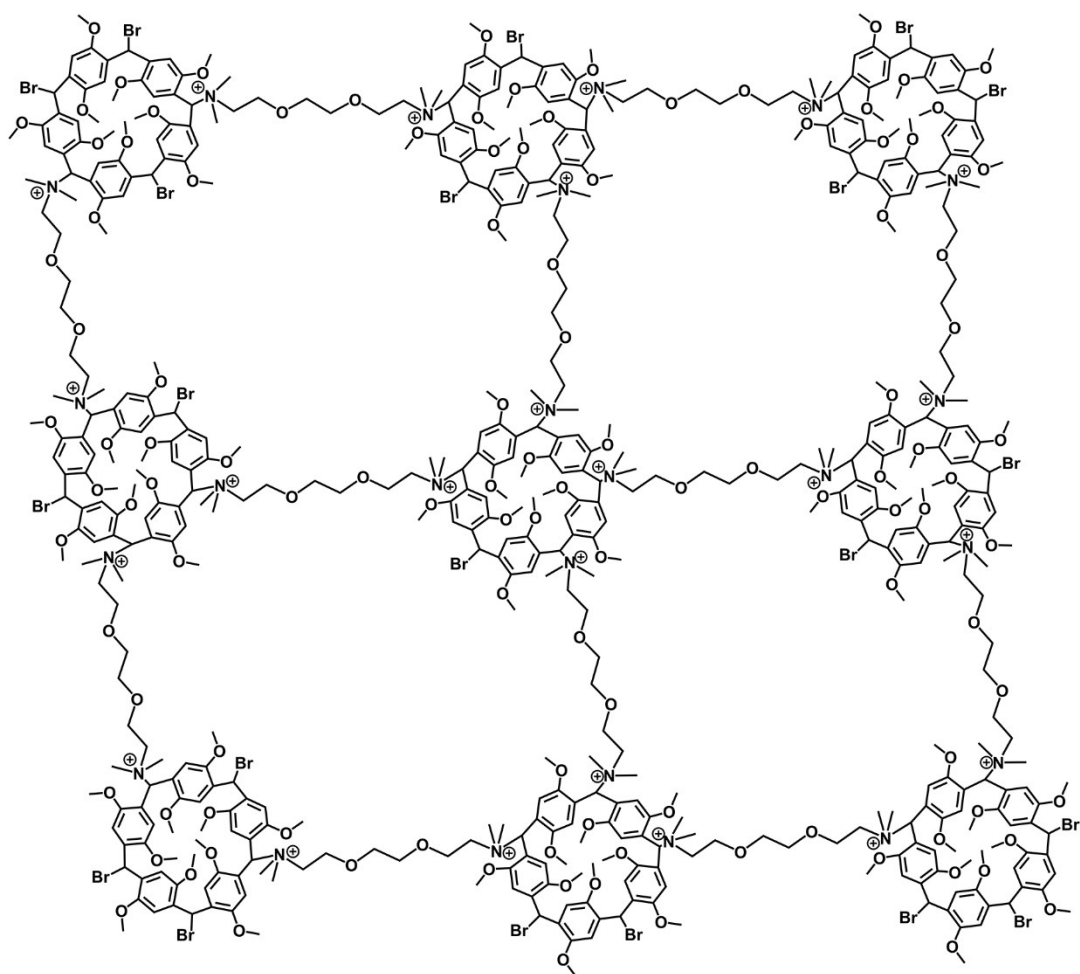

**Figure S9** Partial chemical structures of polymer capsules.

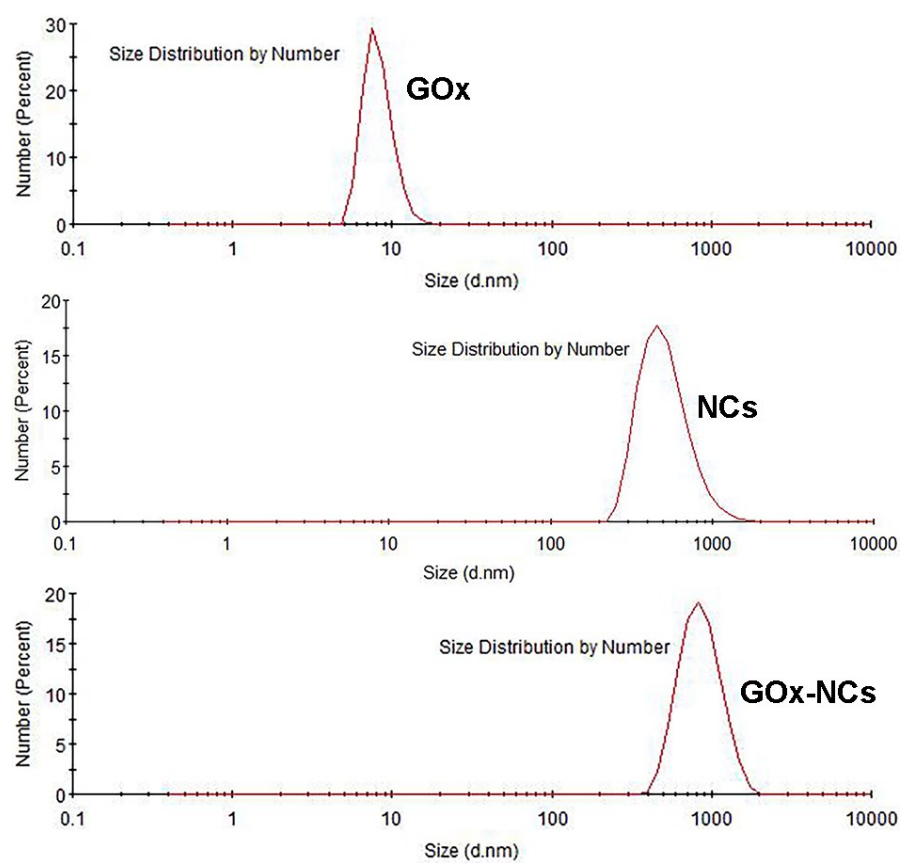

**Figure S10** Hydrodynamic sizes of GOx, NCs and GOx-NCs.

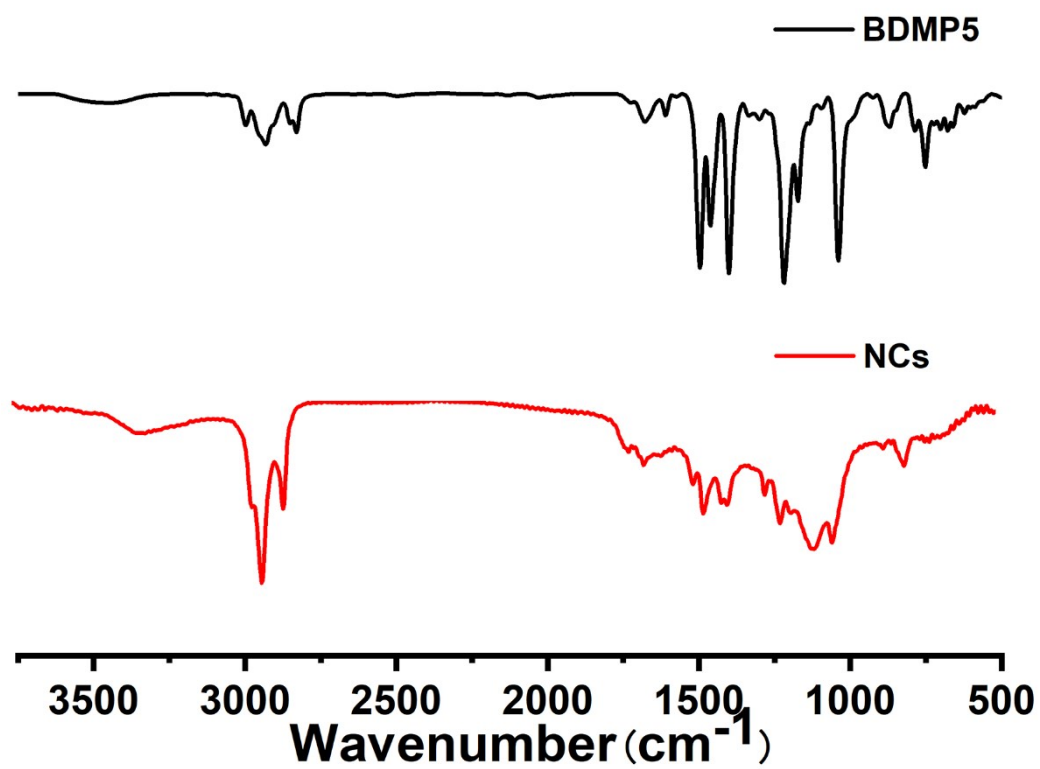

**Figure S11** FTIR spectrum of BDMP5 and polymer capsules.

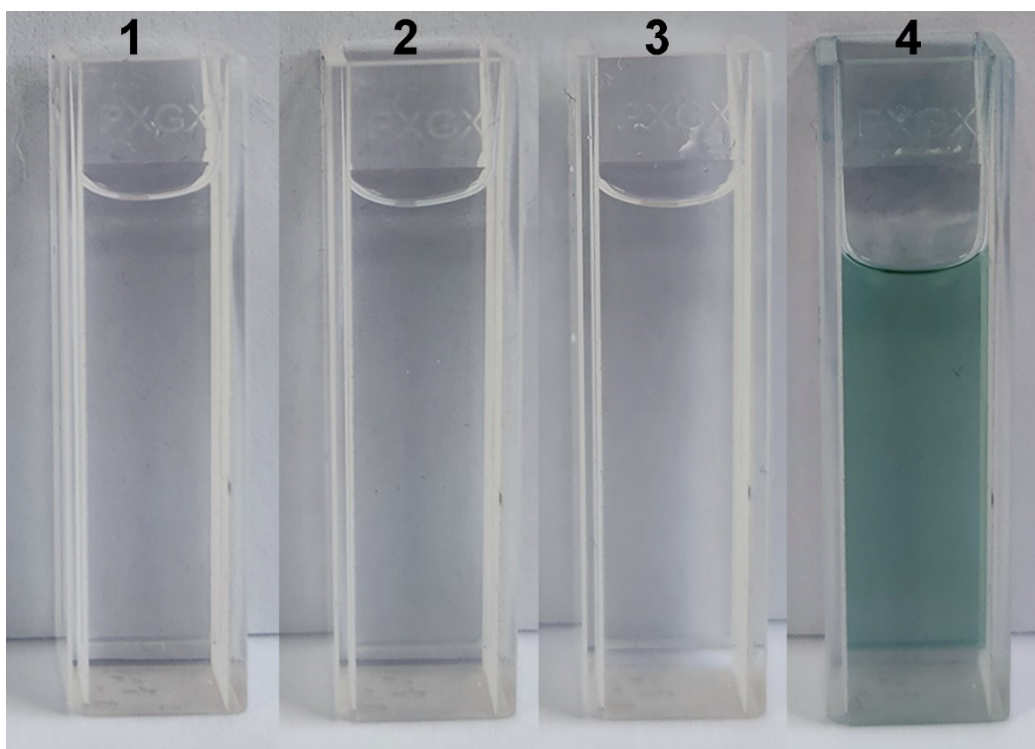

**Figure S12** Pictures TMB solution after different treatment. 1: TMB solution; 2: TMB solution incubated with glucose; 3: TMB solution incubated with GOx-NCs complex; 4: TMB solution incubated with GOx-NCs complex and glucose.
